# Supplementary material for: Strain-specific alterations in gut microbiome and host immune responses elicited by Bifidobacterium pseudolongum
Source: Research Square preprint supplement (doi:10.21203/rs.3.rs-1458908/v1), 2022-03-18
Supplement: Supplementary file 1 [file 0490c6f978f9d6e695d552b0.xlsx]

## Sheet: A. genome
filename	platform	Accession	Biosample	BioProject	morphology	sum	#reads	#bases	coverage	n	min	mean	max	n50	n50_len	CDS	tRNA	rRNA	miscellaneous RNA	tmRNA	signal_peptide
ATCC25526	Illumina MiSeq	SUB11191739	SAMN26664671	PRJNA809764	NA	1990996	1385282	416969882	209.428	1	1990996	1990996	1990996	1	1990996	1586	51	4	8	1	75
E	Illumina MiSeq	JALBGH000000000	SAMN26664744	PRJNA809764	small	2008865	1441578	433914978	216	31	438	64802	450596	4	202271	1659	54	7	8	1	88
EM10	Illumina MiSeq	SUB11191760	SAMN26664777	PRJNA809764	large	2004405	1346618	405332018	202.221	2	5513	1002202	1998892	1	1998892	1642	50	4	8	1	85
EM13	Illumina MiSeq	SUB11191777	SAMN26664808	PRJNA809764	large	1995059	1331080	400655080	200.824	1	1995059	1995059	1995059	1	1995059	1640	50	4	8	1	85

## Sheet: B. metagenome
No	group	# raw reads	# reads after QC	# reads after removing host	% non-host reads
31	MD	48436610	47943918	46615618	96.2405
32	MD	39960740	39507450	39262912	98.2537
33	MD	45755476	45244646	40196010	87.8496
34	MD	44171690	43755016	43041852	97.4422
35	ATCC	35853920	35322296	26273328	73.2788
36	ATCC	44139156	43663918	40547570	91.863
37	ATCC	41112228	40652922	39290530	95.569
38	ATCC	27956100	27471288	24840790	88.8564
40	DESULFO	50590184	50114030	48612930	96.0916
41	DESULFO	47146780	46584074	44285648	93.9314
42	DESULFO	38590646	37770764	34429754	89.2179
43	CONTROL	44265596	43317694	43453770	98.166
44	CONTROL	53989674	53220380	48124972	89.1374
45	CONTROL	56399392	55731670	49698596	88.119
